# Supplementary material for: Poly(alkyl-biphenyl pyridinium) anion exchange membranes with a hydrophobic side chain for mono-/divalent anion separation
Source: Royal Society of Chemistry journal article supplement (doi:10.1039/d2im00043a), 2023-01-01
Supplement: d2im00043a1.pdf [file d2im00043a1.pdf]

## Electronic Supplementary Information (ESI)

Poly(alkyl-biphenyl pyridinium) anion exchange membranes with a  
hydrophobic side chain for mono-/divalent anions separation

Hongxin Yang,<sup>‡<sup>a</sup></sup> Noor Ul Afsar,<sup>‡<sup>a</sup></sup> Qian Chen,<sup>a</sup> Xiaolin Ge,<sup>a</sup> Xingya Li,<sup>a</sup> Liang Ge,<sup>\*<sup>a</sup> <sup>b</sup></sup>  
Tongwen Xu<sup>\*<sup>a</sup></sup>

<sup>a</sup> Anhui Provincial Engineering Laboratory of Functional Membrane Materials and  
Technology, Department of Applied Chemistry, School of Chemistry and Materials  
Science, University of Science and Technology of China, Hefei 230026, PR China

<sup>b</sup> Applied Engineering Technology Research Center for Functional Membranes,  
Institute of Advanced Technology, University of Science and Technology of China,  
Hefei, 230088, PR China

\*Corresponding authors. E-mail address: geliang@ustc.edu.cn (L. Ge);  
twxu@ustc.edu.cn (T. Xu)

<sup>‡</sup>These authors contributed equally to this work.

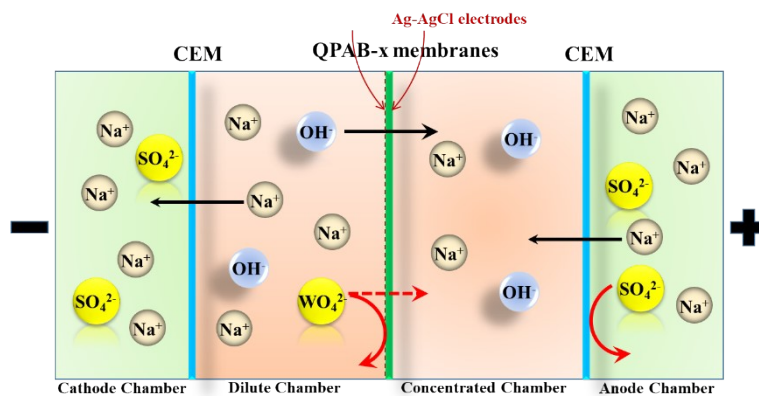

Fig. S1. Graphic diagram of ED stack for mono-/divalent anions separation.

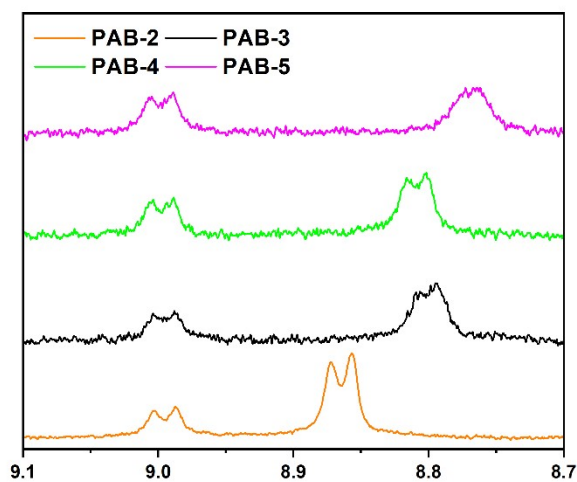

Fig. S2. The  $^1\text{H}$  NMR of QPAB-x membranes with chemical shift between 8.7-9.1 ppm.

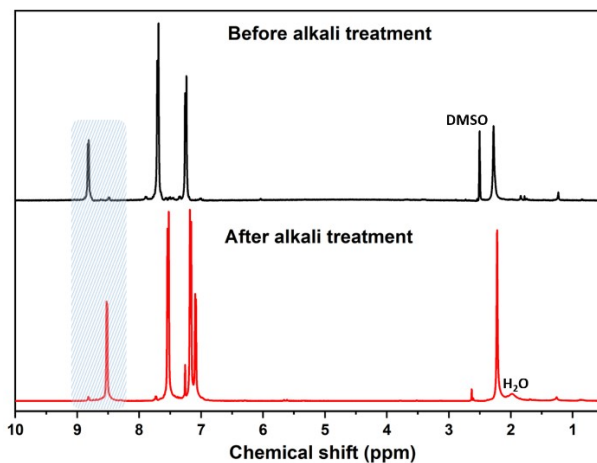

Fig. S3. The  $^1\text{H}$  NMR spectra of PAB polymer before (black line) and after (red line) immersing in 1 mol  $\text{L}^{-1}$  NaOH solution for 10 days.

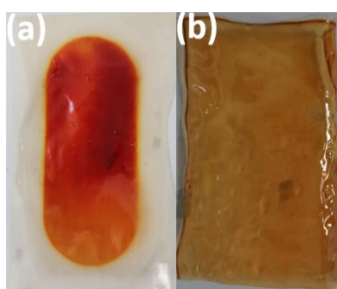

Fig. S4. The photos of (a) the Neosepta ACS membrane after 1 h of ED test in OH-/WO<sub>4</sub><sup>2-</sup> system; and (b) the QPAB-2 membrane after 20 h of ED test in OH-/WO<sub>4</sub><sup>2-</sup> system.

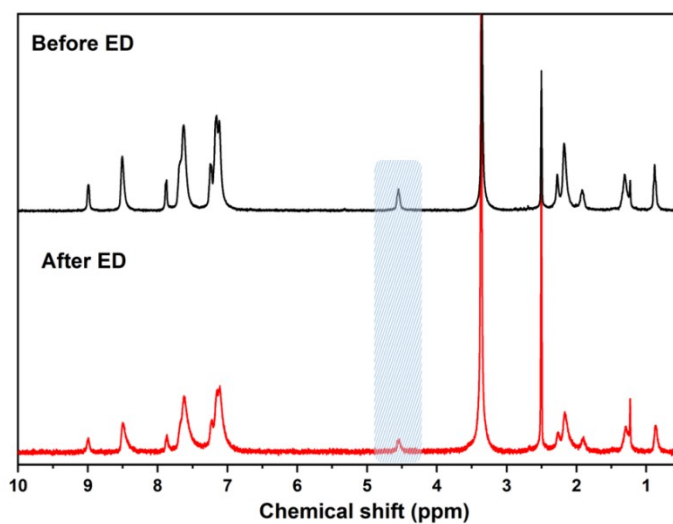

Fig. S5. The <sup>1</sup>H NMR of the QPAB-2 membrane before and after the ED test in OH-/WO<sub>4</sub><sup>2-</sup> system for structure reconfirmation.

Table S1. Mechanical properties of QPAB-x membranes

| S. No. | Polymer | Tensile strength (MPa) | Elongation at break (%) |
|--------|---------|------------------------|-------------------------|
| 1      | QPAB-2  | 35.13                  | 16.5                    |
| 2      | QPAB-3  | 36.14                  | 12.6                    |
| 3      | QPAB-4  | 33.30                  | 13.5                    |
| 4      | QPAB-5  | 37.13                  | 16.8                    |
